# Supplementary material for: Localized flexible integration of high-efficiency surface enhanced Raman scattering (SERS) monitors into microfluidic channels
Source: Royal Society of Chemistry journal article supplement (doi:10.1039/c1lc20397e), 2011-01-01
Supplement: c1lc20397e.pdf [file c1lc20397e.pdf]

**Electronic Supplementary Information (ESI) for**  
**Localized flexible integration of high-efficiency surface enhanced**  
**Raman scattering (SERS) monitors into microfluidic channels †**

5 Bin-Bin Xu,<sup>a</sup> Zhuo-Chen Ma,<sup>a</sup> Lei Wang,<sup>a</sup> Ran Zhang,<sup>a</sup> Li-Gang Niu,<sup>a</sup> Zhe Yang,<sup>b</sup> Yong-Lai Zhang,<sup>a</sup>  
Wan-Hua Zheng,<sup>c</sup> Bing Zhao,<sup>b</sup> Ying Xu,<sup>a</sup> Qi-Dai Chen,<sup>a</sup> Hong Xia,<sup>\*a</sup> Hong-Bo Sun<sup>\*a,d</sup>

*Received (in XXX, XXX) Xth XXXXXXXXXX 200X, Accepted Xth XXXXXXXXXX 200X*

*First published on the web Xth XXXXXXXXXX 200X*

DOI: 10.1039/b000000x

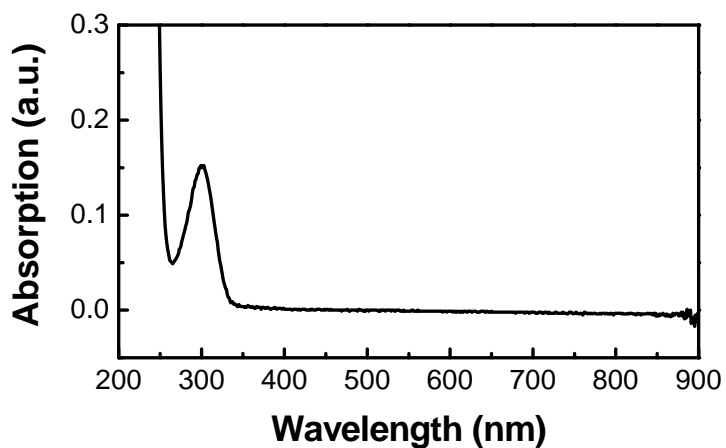

**Fig. S1** Absorption spectrum of silver precursor used for laser processing.

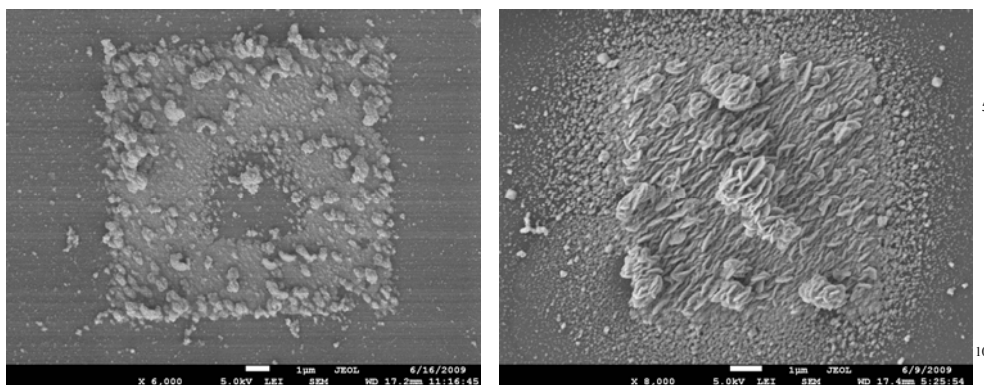

**Fig. S2** SEM images of silver substrate fabricated with the laser power of (a) 3 mW, (b) 18 mW.

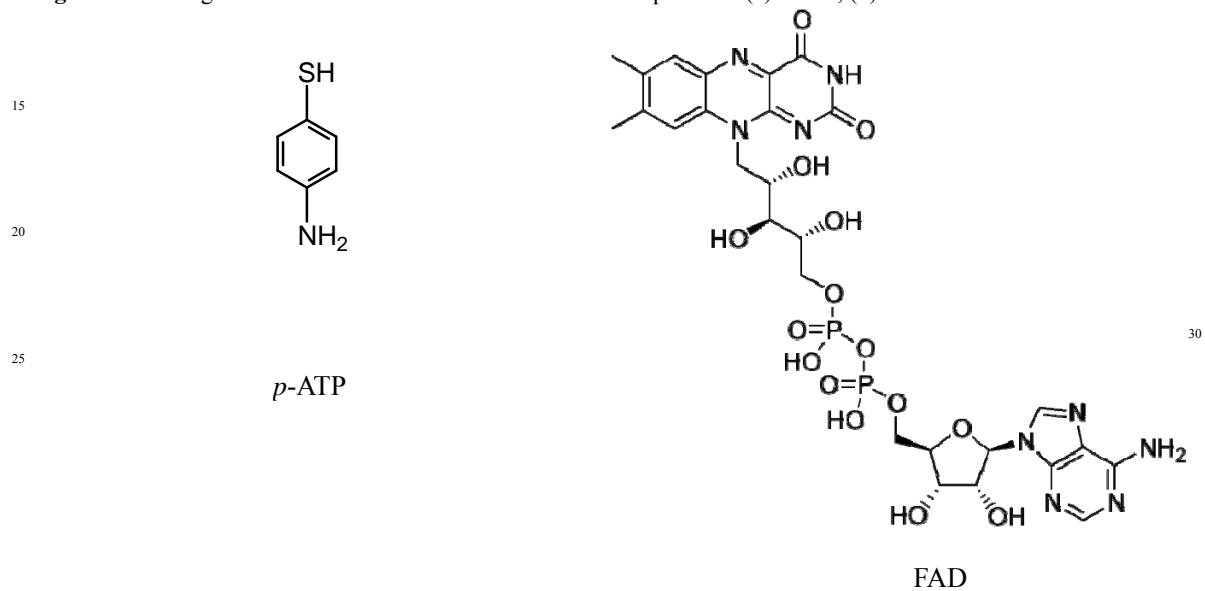

**Scheme S1.** Molecular structure of *p*-aminothiophenol (*p*-ATP) and flavin adenine dinucleotide (FAD).

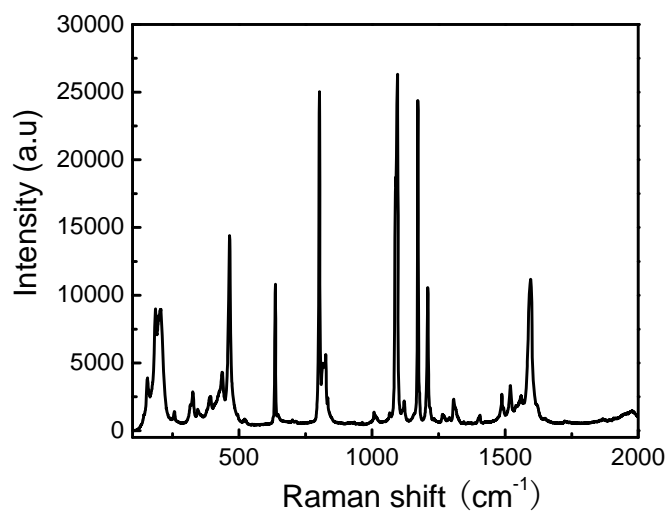

**Fig. S3** Raman spectrum of *p*-ATP solid powder

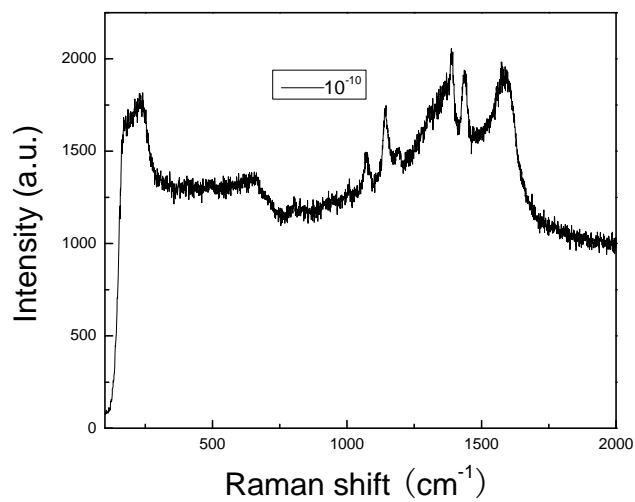

**Fig. S4** SERS spectrum of *p*-ATP adsorbed on silver nanoplates ( $10^{-10}$  M)

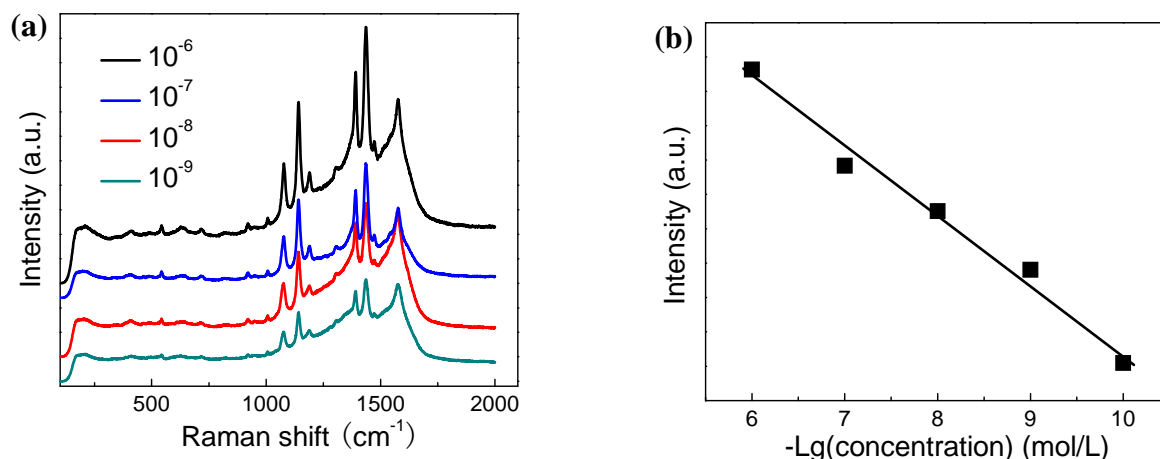

**Fig. S5** (a) SERS spectrum of *p*-ATP adsorbed on silver substrate ( $10^{-6} \sim 10^{-9}$  M); (b) dependence of peak intensity ( $1075\text{cm}^{-1}$ ) on the concentration of *p*-ATP ( $10^{-6} \sim 10^{-10}$  M).

5

### Estimation of enhancement factor

Taking P-aminothiophenol (*p*-ATP) as test molecules, the enhancement factor (EF) of the samples was estimated, in order of magnitude, by the equation:

$$10 \quad \mathbf{EF} = (I_{\text{SERS}}/N_{\text{ads}})/(I_{\text{bulk}}/N_{\text{bulk}}) \quad [\text{s1}]$$

Where  $I_{\text{SERS}}$  and  $I_{\text{bulk}}$  are the Raman signals at a certain vibration for the *p*-ATP molecules adsorbed on a substrate with SERS effect and solid *p*-ATP molecules, respectively.  $N_{\text{ads}}$  and  $N_{\text{bulk}}$  are the numbers of the adsorbed and the solid *p*-ATP molecules within the laser spot, respectively. In our experimental condition for solid *p*-ATP, the probe volume could be considered to be a tube with a waist diameter of  $\sim 1.0\mu\text{m}$  and a depth of  $\sim 20\mu\text{m}$ . So we can calculate the  $N_{\text{bulk}}$  value, about  $9.4 \times 10^{10}$ . The  $N_{\text{ads}}$  can be calculated by dipping definite  
15 volume *p*-ATP/ ethanol solution (0.1 nM) on the substrate, estimating the existing area and the amount of molecule in the laser dot can be attained. We estimate the EF value, for the vibration at  $1075\text{cm}^{-1}$ .

$$\mathbf{EF} = 4 \times 10^8$$

[s1] Orendorff C J, Gole A, Say T K and Murphy C J, Anal. Chem 2005, 77, 3261-3266.

20
